# Supplementary material
Source: Springer Nature journal article supplement (https://www.springermedizin.de/resource/supplementary/12968_2012_3270_MOESM7_ESM.pdf/9583514)

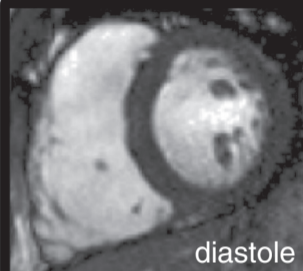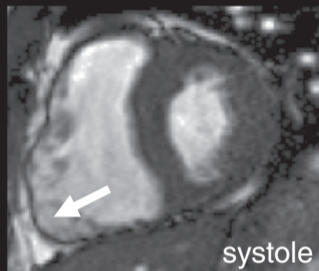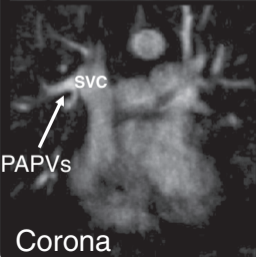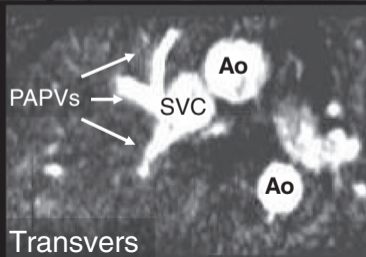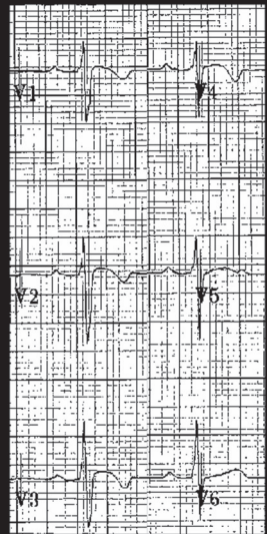

Supplement: MOESM7 [file 9583514]
